# Supplementary material for: The Effect of Air Pollution on Lung Development from 10 to 18 Years of Age
Source: Atypon-hosted journal article supplement (doi:10.1056/nejmoa040610), 2004-09-08
Supplement: 1057sa1.pdf [file 1057sa1.pdf]

## Supplementary Appendix

This appendix has been provided by the authors to give readers additional information about their work.

Supplement to: Gauderman WJ, Avol E, Gilliland F, et al. The effect of air pollution on lung development from 10 to 18 years of age. *N Engl J Med* 2004;351:1057-67.

**TABLE A (ONLINE): BASELINE CHARACTERISTICS FOR ALL STUDY SUBJECTS, AND FOR SUBGROUPS DEFINED BY LENGTH OF FOLLOW-UP**

| BASELINE CHARACTERISTIC                  | ALL COHORT MEMBERS (N=1,759) | LENGTH OF FOLLOW-UP |                 | P-VALUE <sup>*</sup> |
|------------------------------------------|------------------------------|---------------------|-----------------|----------------------|
|                                          |                              | < 8 YEARS (N=1,013) | 8 YEARS (N=746) |                      |
|                                          | %                            | %                   | %               |                      |
| Female sex                               | 49.8                         | 51.1                | 48.9            | 0.36                 |
| Race <sup>†</sup>                        |                              |                     |                 |                      |
| Asian                                    | 4.4                          | 3.4                 | 5.8             |                      |
| African-American                         | 4.8                          | 5.4                 | 3.9             |                      |
| Caucasian                                | 65.9                         | 64.6                | 67.6            |                      |
| Other                                    | 17.5                         | 19.4                | 15.0            |                      |
| Mixed                                    | 7.4                          | 7.2                 | 7.8             | <0.001               |
| Hispanic ethnicity                       | 26.7                         | 27.3                | 25.9            | <0.001               |
| History of Asthma                        | 13.4                         | 12.7                | 15.0            | 0.18                 |
| Pets in the home                         | 74.5                         | 71.5                | 78.7            | <0.001               |
| Gasstove in the home                     | 77.1                         | 78.0                | 75.8            | 0.28                 |
| In-utero exposure to maternal smoking    | 19.1                         | 23.0                | 13.9            | <0.001               |
| ETS exposure at home                     | 21.8                         | 26.9                | 15.0            | <0.001               |
| Parental Education                       |                              |                     |                 |                      |
| Less than high school                    | 14.1                         | 17.4                | 9.7             |                      |
| High school                              | 19.5                         | 20.5                | 18.1            |                      |
| Some college                             | 44.0                         | 43.9                | 44.1            |                      |
| Bachelor's degree                        | 10.4                         | 9.3                 | 11.9            |                      |
| Post-graduate                            | 12.1                         | 8.9                 | 16.3            | <0.001               |
|                                          | Mean (SD)                    | Mean (SD)           | Mean (SD)       |                      |
| Baseline Pulmonary Function <sup>‡</sup> |                              |                     |                 |                      |
| FVC (ml)                                 | 2,328 (389)                  | 2,339 (398)         | 2,313 (376)     | 0.17                 |
| FEV <sub>1</sub> (ml)                    | 2,018 (326)                  | 2,025 (334)         | 2,007 (314)     | 0.27                 |
| MMEF (ml/sec)                            | 2,288 (594)                  | 2,294 (608)         | 2,281 (575)     | 0.66                 |
| Baseline Air Pollution                   |                              |                     |                 |                      |
| O <sub>3</sub> , 1 hr max (ppb)          | 66.9 (19.2)                  | 67.2 (19.4)         | 66.4 (19.0)     | 0.41                 |
| O <sub>3</sub> , 10am-6pm (ppb)          | 52.0 (14.6)                  | 52.3 (14.8)         | 51.6 (14.4)     | 0.38                 |
| NO <sub>2</sub> (ppb)                    | 22.3 (11.7)                  | 22.2 (11.5)         | 22.4 (12.0)     | 0.79                 |
| Acid Vapor (ppb)                         | 7.2 (3.2)                    | 7.2 (3.2)           | 7.2 (3.2)       | 0.77                 |
| PM <sub>10</sub> (ug/m <sup>3</sup> )    | 34.0 (14.2)                  | 34.2 (14.2)         | 33.8 (14.1)     | 0.65                 |
| PM <sub>2.5</sub> (ug/m <sup>3</sup> )   | 15.5 (8.3)                   | 15.6 (8.3)          | 15.4 (8.2)      | 0.52                 |
| Elemental Carbon (ug/m <sup>3</sup> )    | 0.7 (0.4)                    | 0.7 (0.4)           | 0.7 (0.4)       | 0.90                 |
| Organic Carbon (ug/m <sup>3</sup> )      | 5.1 (2.6)                    | 5.1 (2.6)           | 5.1 (2.6)       | 0.88                 |

\* p-value for a difference in distribution between the two length-of-follow-up groups, based on chi-squared tests for percentages and t-tests for means

† Race was reported by parents on a baseline questionnaire that offered a list of choices. 'Other' was one of the possible responses to this question; 'Mixed' includes subjects that provided two or more responses

‡ Values are the geometric mean and standard deviation for pulmonary function measures
